# Supplementary material for: Preliminary Study on Growth and Yield Potential of Ten Elite Lines of Quinoa (Chenopodium quinoa) Cultivated under Varying Sowing Dates
Source: MDPI journal article supplement (doi:10.3390/plants11162116), 2022-08-15
Supplement: s1 [file s1]

Table S1. Analysis of variance (mean sum of squares) of emergence percentage, days to anthesis, chlorophyll, protein, sodium and potassium contents of leaf, plant height, stem diameter, number of branches and leaves, leaf area, number of panicles, main panicle length, biological and grain yield, and thousand grain weight.

| SOV               | DF | Emergence percentage | Days to anthesis | Chlorophyll content | Protein content    | Sodium content        | Potassium content | Plant height | Stem diameter         |
|-------------------|----|----------------------|------------------|---------------------|--------------------|-----------------------|-------------------|--------------|-----------------------|
| Sowing dates (SD) | 2  | 158.7*               | 4.811*           | 158.47*             | 6.56NS             | 7.61 <sup>-5</sup> ** | 1.097**           | 35.075*      | 18.45*                |
| Accessions (AC)   | 9  | 246.1**              | 57.82**          | 304.56**            | 19.02**            | 2.03 <sup>-5</sup> ** | 0.315**           | 65.423**     | 7.98**                |
| SD × AC           | 18 | 527.9**              | 146.7**          | 373.07**            | 6.42*              | 7.76 <sup>-5</sup> ** | 0.528**           | 212.202**    | 21.34**               |
|                   |    | Number of branches   | Number of leaves | Leaf area           | Number of panicles | Panicle length        | Biological yield  | Grain yield  | Thousand grain weight |
| Sowing dates (SD) | 2  | 53.98NS              | 611**            | 403.51**            | 15.94*             | 214.03**              | 142540NS          | 384319*      | 0.334**               |
| Accessions (AC)   | 9  | 27.26**              | 1735**           | 10.15**             | 15.41**            | 10.92**               | 1172410**         | 227528**     | 0.244**               |
| SD × AC           | 18 | 90.36**              | 4478**           | 43.45**             | 47.09**            | 150.61**              | 4226349**         | 661319**     | 0.984**               |

SOV = Source of variance, DF = Degree of freedom, NS = Statistically non-significant, \* = significant at  $P < 0.05$ , \*\* = significant at  $P < 0.01$ .
